# Supplementary material for: Activation energies and information entropies of helium penetration through fullerene walls. Insights into the formation of endofullerenes nX@C60/70(n = 1 and 2) from the information entropy approach
Source: Royal Society of Chemistry journal article supplement (doi:10.1039/c6ra12228k), 2016-01-01
Supplement: c6ra12228k1.pdf [file c6ra12228k1.pdf]

## Supporting information to the article

### Activation energies and information entropies of helium penetration through the fullerene walls. Insights into the formation of endofullerenes $nX@C_{60/70}$ ( $n = 1$ and $2$ ) from the information entropy approach

Denis Sh. Sabirov,<sup>1\*</sup> Anton O. Terentyev,<sup>1</sup> Viacheslav I. Sokolov<sup>2</sup>

<sup>1</sup> Institute of Petrochemistry and Catalysis, Russian Academy of Sciences, 450075 Ufa, Russia

<sup>2</sup> A. N. Nesmeyanov Institute of Organoelement Compounds, Russian Academy of Sciences, 119991 Moscow, Russia

E-mail: diozno@mail.ru

#### Section A

Structures and imaginary vibration frequencies of the transition states and corresponding activation energies of helium insertion into the fullerenes through the hexagons. The B3LYP/Λ1 calculations\*

| Transition state                             | $L$ (Å)                                                                               | $L_{\text{He}\dots\text{C}}$ (Å) | $E_{\text{act}}$ (kJ mol <sup>-1</sup> ) | $\nu_{\text{imag}}$ (cm <sup>-1</sup> ) |
|----------------------------------------------|---------------------------------------------------------------------------------------|----------------------------------|------------------------------------------|-----------------------------------------|
| TS <sub>hex</sub> (He + C <sub>60</sub> )    | 1.653 (5.6 bond),<br>1.500 (6.6 bond)                                                 | 1.578                            | 843.4                                    | -1148.4                                 |
| TS <sub>abccba</sub> (He + C <sub>70</sub> ) | 1.576 ( <i>ab</i> ), 1.750 ( <i>bc</i> ),<br>1.554 ( <i>cc</i> ), 1.800 ( <i>aa</i> ) | 1.662–<br>1.678                  | 859.1                                    | -991.6                                  |
| TS <sub>ccdeed</sub> (He + C <sub>70</sub> ) | 1.551 ( <i>cc</i> ), 1.730 ( <i>cd</i> ),<br>1.612 ( <i>de</i> ), 1.832 ( <i>ee</i> ) | 1.666–<br>1.697                  | 814.5                                    | -953.4                                  |
| TS <sub>ddedde</sub> (He + C <sub>70</sub> ) | 1.684 ( <i>dd</i> ), 1.644 ( <i>de</i> )                                              | 1.643–<br>1.677                  | 849.4                                    | -970.9                                  |

The B3LYP/Λ1 calculations qualitatively mimic the results obtained by PBE/3ζ though the absolute values are ~100 kJ mol<sup>-1</sup> lower in the first case. For example, the B3LYP/Λ1 activation energies increase in the series of the corresponding TSs: TS<sub>ccdeed</sub>(He + C<sub>70</sub>) < TS<sub>hex</sub>(He + C<sub>60</sub>) < TS<sub>ddedde</sub>(He + C<sub>70</sub>) < TS<sub>abccba</sub>(He + C<sub>70</sub>). The same order is observed in the case of PBE/3ζ (cf. Fig. 5 of the article).

The B3LYP/Λ1 calculations reproduces the results of scanning the triplet potential energy surface by the PBE/3ζ method (cf. Figure 1 of the article): both methods show no extremums under elongation and subsequent cleavage of the 5.6 carbon–carbon bond. The B3LYP/Λ1 plot is below.

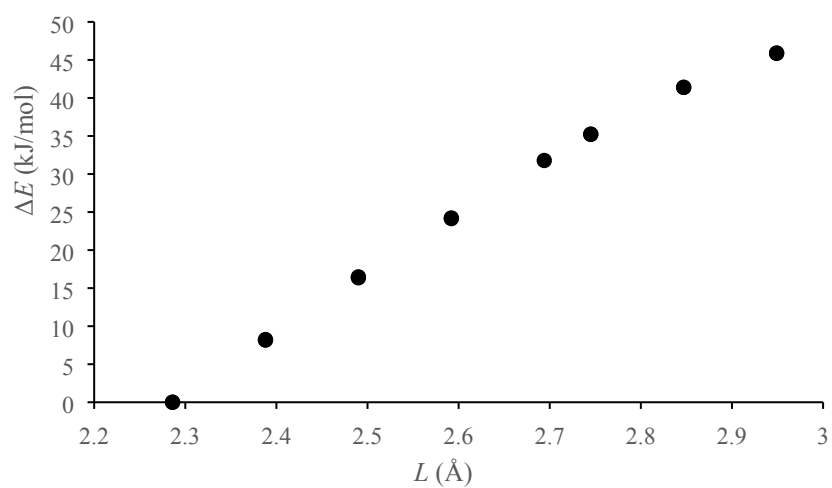

### Section B

Cartesian coordinates of the structures of endofullerenes  $\text{He}_n@C_{60/70}$  ( $n = 1, 2$ ) and transition states of their formation optimized by the PBE/3 $\zeta$  method are provided below.

## He@C<sub>60</sub>

|   |             |             |             |
|---|-------------|-------------|-------------|
| 6 | -0.69947448 | -1.24334313 | 3.25430490  |
| 6 | 0.69964378  | -1.24334992 | 3.25431261  |
| 6 | -1.42620503 | 0.01541033  | 3.25438932  |
| 6 | 1.42634473  | 0.01542195  | 3.25427565  |
| 6 | -0.72666437 | 1.22708400  | 3.25449173  |
| 6 | 0.72681240  | 1.22709101  | 3.25444828  |
| 6 | -1.42621707 | -2.18147519 | 2.41504504  |
| 6 | 1.42633475  | -2.18143013 | 2.41494972  |
| 6 | -0.72668433 | -3.08452295 | 1.60717132  |
| 6 | 0.72678918  | -3.08451766 | 1.60713735  |
| 6 | 2.60222211  | -0.14476311 | 2.41509726  |
| 6 | 2.60220104  | -1.50249832 | 1.89634701  |
| 6 | 3.03454764  | 0.91269990  | 1.60740197  |
| 6 | 3.03456626  | -1.75203379 | 0.58932445  |
| 6 | 3.48365691  | 0.65350036  | 0.24958453  |
| 6 | 3.48363859  | -0.65346800 | -0.24975379 |
| 6 | 3.03451574  | 1.75205967  | -0.58947452 |
| 6 | 3.03448256  | -0.91267943 | -1.60755769 |
| 6 | 2.60208350  | 1.50252308  | -1.89646913 |
| 6 | 2.60208788  | 0.14477990  | -2.41521741 |
| 6 | 1.42622048  | 2.18148752  | -2.41504813 |
| 6 | 1.42622221  | -0.01541761 | -3.25441838 |
| 6 | 0.69946221  | 1.24331522  | -3.25423167 |
| 6 | -2.60209304 | -0.14478798 | 2.41522595  |
| 6 | -2.60210179 | -1.50253092 | 1.89648647  |
| 6 | -3.03447176 | 0.91266653  | 1.60755231  |
| 6 | -3.03449919 | -1.75204697 | 0.58947211  |
| 6 | -3.48365345 | 0.65346856  | 0.24975303  |
| 6 | -3.48364985 | -0.65349542 | -0.24958722 |
| 6 | -3.03455090 | 1.75202920  | -0.58932676 |
| 6 | -3.03455627 | -0.91270112 | -1.60741727 |
| 6 | -2.60219645 | 1.50250724  | -1.89634966 |
| 6 | -2.60220814 | 0.14476109  | -2.41509702 |
| 6 | -1.42635617 | 2.18147064  | -2.41497103 |
| 6 | -1.42637153 | -0.01543115 | -3.25432985 |
| 6 | -0.69963628 | 1.24332009  | -3.25422508 |
| 6 | 0.72668637  | 3.08454298  | -1.60717680 |
| 6 | -0.72679550 | 3.08455137  | -1.60714689 |
| 6 | 1.17586344  | 3.34373534  | -0.24936731 |
| 6 | -1.17591150 | 3.34373111  | -0.24931394 |
| 6 | -0.00000252 | 3.50388009  | 0.58982949  |
| 6 | 0.00003150  | 3.00456915  | 1.89680609  |
| 6 | -1.17582461 | 2.32558995  | 2.41537767  |
| 6 | -2.30778822 | 2.17144702  | 1.60766584  |
| 6 | 2.30778580  | 2.69019732  | 0.24978575  |
| 6 | 1.17592666  | 2.32562538  | 2.41533810  |
| 6 | 2.30783058  | 2.17146117  | 1.60754607  |
| 6 | -2.30778621 | 2.69015824  | 0.24989477  |
| 6 | -0.72681609 | -1.22710210 | -3.25447092 |
| 6 | 0.72666485  | -1.22708170 | -3.25446328 |
| 6 | -1.17592990 | -2.32562699 | -2.41535077 |
| 6 | 1.17582566  | -2.32561412 | -2.41538573 |
| 6 | -0.00003724 | -3.00456154 | -1.89679794 |
| 6 | -0.00000296 | -3.50390814 | -0.58983375 |
| 6 | -1.17587402 | -3.34374852 | 0.24937204  |
| 6 | -2.30776491 | -2.69017407 | -0.24978928 |
| 6 | -2.30782849 | -2.17144902 | -1.60755228 |
| 6 | 1.17589607  | -3.34367961 | 0.24930259  |
| 6 | 2.30781415  | -2.69019045 | -0.24990487 |
| 6 | 2.30778857  | -2.17145224 | -1.60766799 |
| 2 | 0.00000135  | 0.00000142  | -0.00000258 |

# He@C<sub>60</sub>, TS<sub>hex</sub>

|   |             |             |             |
|---|-------------|-------------|-------------|
| 6 | -0.69898081 | -1.29263806 | 3.30947185  |
| 6 | 0.69914895  | -1.29262877 | 3.30943990  |
| 6 | -1.42707849 | -0.03427488 | 3.30736780  |
| 6 | 1.42722964  | -0.03425605 | 3.30730271  |
| 6 | -0.72571313 | 1.17793715  | 3.29636049  |
| 6 | 0.72584718  | 1.17794704  | 3.29632664  |
| 6 | -1.42602134 | -2.23116207 | 2.46991277  |
| 6 | 1.42616355  | -2.23114276 | 2.46984673  |
| 6 | -0.72696882 | -3.13357997 | 1.66261268  |
| 6 | 0.72708595  | -3.13356948 | 1.66257882  |
| 6 | 2.60256147  | -0.19513214 | 2.47171569  |
| 6 | 2.60117674  | -1.54972589 | 1.95156217  |
| 6 | 3.03440261  | 0.86310542  | 1.66273332  |
| 6 | 3.02653909  | -1.79205012 | 0.63937294  |
| 6 | 3.47955155  | 0.61086595  | 0.30667838  |
| 6 | 3.47067595  | -0.69078475 | -0.19660898 |
| 6 | 3.05270839  | 1.72146916  | -0.53256512 |
| 6 | 3.01885200  | -0.94489998 | -1.55797517 |
| 6 | 2.65462637  | 1.48282516  | -1.86909294 |
| 6 | 2.61169696  | 0.10317937  | -2.37700891 |
| 6 | 1.57668138  | 2.22520995  | -2.42110181 |
| 6 | 1.44936728  | -0.07300528 | -3.26086044 |
| 6 | 0.74996436  | 1.15803349  | -3.37573433 |
| 6 | -2.60244608 | -0.19516703 | 2.47183323  |
| 6 | -2.60106826 | -1.54976213 | 1.95168233  |
| 6 | -3.03433871 | 0.86306334  | 1.66286910  |
| 6 | -3.02649045 | -1.79209554 | 0.63951457  |
| 6 | -3.47954822 | 0.61081505  | 0.30683485  |
| 6 | -3.47068334 | -0.69083804 | -0.19644804 |
| 6 | -3.05275083 | 1.72141933  | -0.53243148 |
| 6 | -3.01892304 | -0.94495243 | -1.55783427 |
| 6 | -2.65472269 | 1.48277175  | -1.86897123 |
| 6 | -2.61181784 | 0.10313061  | -2.37688637 |
| 6 | -1.57677937 | 2.22513795  | -2.42102933 |
| 6 | -1.44952846 | -0.07303175 | -3.26078868 |
| 6 | -0.75014824 | 1.15802526  | -3.37565541 |
| 6 | 0.82662308  | 3.19341183  | -1.55491066 |
| 6 | -0.82672900 | 3.19338202  | -1.55488396 |
| 6 | 1.20519698  | 3.35389590  | -0.19522597 |
| 6 | -1.20524526 | 3.35386705  | -0.19517851 |
| 6 | -0.00000899 | 3.47466278  | 0.63911462  |
| 6 | 0.00002310  | 2.95214486  | 1.92831433  |
| 6 | -1.17593491 | 2.27140188  | 2.45342278  |
| 6 | -2.31114101 | 2.11909127  | 1.65606475  |
| 6 | 2.32999802  | 2.65442443  | 0.30205619  |
| 6 | 1.17601597  | 2.27141857  | 2.45337081  |
| 6 | 2.31118941  | 2.11912465  | 1.65596318  |
| 6 | -2.33001328 | 2.65438581  | 0.30215687  |
| 6 | -0.72279191 | -1.28635657 | -3.22317958 |
| 6 | 0.72265166  | -1.28634405 | -3.22321200 |
| 6 | -1.16842651 | -2.37264419 | -2.36215973 |
| 6 | 1.16834164  | -2.37262368 | -2.36221266 |
| 6 | -0.00002461 | -3.05397630 | -1.84130549 |
| 6 | 0.00000967  | -3.55471683 | -0.53361189 |
| 6 | -1.17394257 | -3.39206147 | 0.30356649  |
| 6 | -2.30072260 | -2.72899938 | -0.19863763 |
| 6 | -2.29472494 | -2.20889926 | -1.55450189 |
| 6 | 1.17399931  | -3.39204311 | 0.30351111  |
| 6 | 2.30074453  | -2.72896242 | -0.19874536 |
| 6 | 2.29467392  | -2.20885849 | -1.55460846 |
| 2 | -0.00003801 | 2.16504002  | -2.42020130 |

## He@C<sub>60</sub>, TS<sub>pent</sub>

|   |             |             |             |
|---|-------------|-------------|-------------|
| 6 | -0.71066856 | -1.25115669 | 3.26860213  |
| 6 | 0.68890554  | -1.25249791 | 3.26991749  |
| 6 | -1.43560326 | 0.00875557  | 3.26699853  |
| 6 | 1.41401207  | 0.00388448  | 3.26453280  |
| 6 | -0.73307467 | 1.22055411  | 3.26012683  |
| 6 | 0.71971107  | 1.21655059  | 3.25260758  |
| 6 | -1.43667686 | -2.18815804 | 2.42951560  |
| 6 | 1.41665578  | -2.19201350 | 2.42978191  |
| 6 | -0.73700130 | -3.09261131 | 1.62161386  |
| 6 | 0.71378046  | -3.09621525 | 1.62218428  |
| 6 | 2.58686376  | -0.16268547 | 2.42337322  |
| 6 | 2.59113169  | -1.52026761 | 1.91235816  |
| 6 | 3.00512910  | 0.88225311  | 1.59592199  |
| 6 | 3.03177834  | -1.77558303 | 0.60450464  |
| 6 | 3.48439479  | 0.60675102  | 0.26343742  |
| 6 | 3.51042771  | -0.69805598 | -0.23373538 |
| 6 | 3.14731598  | 1.73766875  | -0.59215415 |
| 6 | 3.09213901  | -0.97160482 | -1.61308897 |
| 6 | 3.17478228  | 1.61454225  | -1.95293474 |
| 6 | 2.75703597  | 0.06902903  | -2.47791672 |
| 6 | 1.33903682  | 2.63281941  | -2.75602126 |
| 6 | 1.47351885  | -0.03381428 | -3.30913162 |
| 6 | 0.63016450  | 1.34798074  | -3.44198060 |
| 6 | -2.61271763 | -0.15299948 | 2.43059134  |
| 6 | -2.61219287 | -1.50959909 | 1.91125679  |
| 6 | -3.04785514 | 0.90481639  | 1.62388456  |
| 6 | -3.04544115 | -1.75938570 | 0.60353065  |
| 6 | -3.49822927 | 0.64514452  | 0.26437125  |
| 6 | -3.49630404 | -0.66402876 | -0.23429859 |
| 6 | -3.05563235 | 1.74040961  | -0.57453275 |
| 6 | -3.04308534 | -0.92174602 | -1.59000242 |
| 6 | -2.62609220 | 1.49392390  | -1.88662958 |
| 6 | -2.60884881 | 0.13444296  | -2.39624977 |
| 6 | -1.48083043 | 2.19217587  | -2.42623615 |
| 6 | -1.43312454 | -0.01389632 | -3.23323107 |
| 6 | -0.75008911 | 1.27316964  | -3.29516935 |
| 6 | 0.67154485  | 3.16845322  | -1.68545079 |
| 6 | -0.77852869 | 3.08097434  | -1.61020958 |
| 6 | 1.17581487  | 3.32355762  | -0.28734395 |
| 6 | -1.18874764 | 3.31044364  | -0.24663141 |
| 6 | 0.00653533  | 3.45985913  | 0.56555843  |
| 6 | -0.00189402 | 2.97817898  | 1.88181078  |
| 6 | -1.18048322 | 2.31399679  | 2.41538811  |
| 6 | -2.31991792 | 2.15936065  | 1.61999166  |
| 6 | 2.30576682  | 2.66908145  | 0.21261571  |
| 6 | 1.16388595  | 2.30443096  | 2.39562583  |
| 6 | 2.28109789  | 2.14202571  | 1.56643116  |
| 6 | -2.32378888 | 2.67407012  | 0.26220217  |
| 6 | -0.72222644 | -1.21532440 | -3.23294759 |
| 6 | 0.73863763  | -1.22341013 | -3.23634839 |
| 6 | -1.17408609 | -2.31364536 | -2.39532971 |
| 6 | 1.17507172  | -2.32410216 | -2.39680362 |
| 6 | -0.00414806 | -2.99635100 | -1.87832773 |
| 6 | -0.01065641 | -3.50716901 | -0.57577235 |
| 6 | -1.18558240 | -3.35023475 | 0.26166791  |
| 6 | -2.31567240 | -2.69626594 | -0.23758677 |
| 6 | -2.31221747 | -2.17388487 | -1.59178400 |
| 6 | 1.16280150  | -3.35401654 | 0.26596212  |
| 6 | 2.29698157  | -2.70742297 | -0.23284885 |
| 6 | 2.30797434  | -2.19125366 | -1.58936942 |
| 2 | 2.19299030  | 1.37669170  | -3.15910387 |

## He@C<sub>70</sub>

|   |             |             |             |
|---|-------------|-------------|-------------|
| 6 | -3.48314095 | -0.51613462 | 2.20760345  |
| 6 | -3.51063704 | 0.82232493  | 1.79730308  |
| 6 | -3.69102287 | 1.15078831  | 0.39798787  |
| 6 | -2.86835241 | 2.29876232  | 0.08481595  |
| 6 | -2.16604757 | 2.68019938  | 1.28201413  |
| 6 | -2.55445790 | 1.76811302  | 2.33556437  |
| 6 | -2.27931309 | 2.46528053  | -1.19911659 |
| 6 | -1.10944128 | 3.27226138  | -1.25711298 |
| 6 | -0.40718105 | 3.65367365  | -0.05988413 |
| 6 | -0.85842836 | 3.23689365  | 1.22305381  |
| 6 | -0.13485178 | 3.11903048  | -2.31513286 |
| 6 | 1.00171196  | 3.73635221  | -0.37755394 |
| 6 | 1.17770064  | 3.41719341  | -1.77958584 |
| 6 | 2.29218984  | 2.68035650  | -2.19858623 |
| 6 | -2.49858785 | -0.95257962 | 3.18149400  |
| 6 | -1.58199656 | -0.03262768 | 3.70506024  |
| 6 | -1.60915148 | 1.34906459  | 3.27064681  |
| 6 | -0.24781284 | 1.82984161  | 3.17951083  |
| 6 | 0.62919807  | 0.74830884  | 3.54442453  |
| 6 | -0.18979920 | -0.40127736 | 3.86126995  |
| 6 | 0.13803875  | 2.79519320  | 2.20872092  |
| 6 | 1.51113248  | 2.80336738  | 1.83754992  |
| 6 | 2.38813305  | 1.72183108  | 2.20246673  |
| 6 | 1.91230679  | 0.60714948  | 2.94698381  |
| 6 | 1.94704902  | 3.31732368  | 0.55750245  |
| 6 | 3.36642146  | 1.56699491  | 1.14810550  |
| 6 | 3.10638380  | 2.56226301  | 0.12813953  |
| 6 | 3.27676463  | 2.24392128  | -1.22471070 |
| 6 | -2.05174828 | -2.28131795 | 2.80324864  |
| 6 | -0.70666540 | -2.63551712 | 2.96411657  |
| 6 | 0.23923352  | -1.67705250 | 3.49809432  |
| 6 | 1.49979389  | -1.84050643 | 2.80746222  |
| 6 | 1.33955252  | -2.89037418 | 1.83580732  |
| 6 | -0.02010709 | -3.37615013 | 1.92555845  |
| 6 | 2.36456895  | -0.73770058 | 2.56414676  |
| 6 | 3.25872183  | -0.86698580 | 1.46551549  |
| 6 | 3.09849119  | -1.91684973 | 0.49385461  |
| 6 | 2.04039121  | -2.86169028 | 0.59838092  |
| 6 | 3.79545283  | 0.29121742  | 0.78493267  |
| 6 | 3.53612351  | -1.40787446 | -0.78760266 |
| 6 | 3.98172998  | -0.04062000 | -0.61280876 |
| 6 | 3.72360921  | 0.91518879  | -1.60295868 |
| 6 | -2.76013398 | -2.66607976 | 1.59559464  |
| 6 | -2.09433532 | -3.38922834 | 0.59842736  |
| 6 | -0.70026010 | -3.74558115 | 0.76603639  |
| 6 | -0.04060955 | -3.64003897 | -0.51709187 |
| 6 | -1.01664197 | -3.20735669 | -1.48257864 |
| 6 | -2.27987790 | -3.04531837 | -0.79649997 |
| 6 | 1.32341135  | -3.25113344 | -0.62390697 |
| 6 | 1.71830571  | -2.66652489 | -1.85902166 |
| 6 | 0.74222159  | -2.23386908 | -2.82446313 |
| 6 | -0.65131527 | -2.37573218 | -2.57718110 |
| 6 | 2.85595202  | -1.77731442 | -1.94711006 |
| 6 | 1.27625620  | -1.07708406 | -3.50958109 |
| 6 | 2.59401703  | -0.79434842 | -2.97846317 |
| 6 | 3.01520300  | 0.53041506  | -2.81059623 |
| 6 | -3.64478636 | -1.57513082 | 1.22746503  |
| 6 | -3.82728481 | -1.25215864 | -0.12270561 |
| 6 | -3.12927628 | -1.99784732 | -1.14995790 |
| 6 | -2.74028206 | -1.08178735 | -2.19984126 |
| 6 | -3.18327141 | 0.23546804  | -1.82487547 |
| 6 | -3.84621859 | 0.13399516  | -0.54309797 |
| 6 | -1.54663789 | -1.27164853 | -2.94975114 |
| 6 | -0.98144627 | -0.10831581 | -3.54171133 |
| 6 | -1.42443919 | 1.20893896  | -3.16674948 |
| 6 | -2.44290376 | 1.39346111  | -2.19109821 |
| 6 | 0.42684731  | -0.02962422 | -3.86304021 |
| 6 | -0.29007405 | 2.10223007  | -3.25620604 |
| 6 | 0.86103219  | 1.34270215  | -3.69958162 |
| 6 | 2.13053322  | 1.62135363  | -3.17871666 |
| 2 | 0.00006130  | -0.00007357 | 0.00002969  |

# He@C<sub>70</sub>, TS<sub>abcba</sub>

6 -1.54692817 -1.73368359 -3.43212438  
6 -1.54185915 -0.07549149 -3.42351580  
6 -0.17744513 0.29635048 -3.30011845  
6 0.66006154 -0.91222340 -3.25747442  
6 -0.18481743 -2.11514115 -3.31264639  
6 -2.59375930 -2.47781491 -2.63729167  
6 1.80860043 -0.91981280 -2.47229362  
6 0.16831943 1.40638173 -2.49394035  
6 -2.58416367 0.66675645 -2.62096214  
6 -0.84967268 -3.94390726 -1.75819111  
6 2.17184997 -2.09049606 -1.69414806  
6 2.17898083 0.24048550 -1.68204427  
6 1.37206089 1.37317193 -1.68734205  
6 -0.83115190 2.11290717 -1.72672915  
6 -0.25910404 -4.37110233 -0.50726688  
6 1.10992277 -3.93492126 -0.48298579  
6 2.76979399 -1.65269673 -0.45317420  
6 2.77419686 -0.21381985 -0.44570193  
6 -0.23800085 2.52347589 -0.47146279  
6 -2.94734812 1.67816103 -0.51565236  
6 -3.83704734 0.52776355 -0.52799171  
6 -3.84576559 -2.35286713 -0.54299301  
6 -2.96319246 -3.50881052 -0.54260725  
6 1.75370669 -3.58087492 0.73383975  
6 2.61861444 -2.39614177 0.75056124  
6 2.62753987 0.51800573 0.76569384  
6 1.76990891 1.70812392 0.76132548  
6 -0.99817455 2.60731339 0.72459310  
6 -2.39797139 2.15276909 0.69931853  
6 -4.13867188 -0.18403615 0.68074596  
6 -4.14315939 -1.65203822 0.67308009  
6 -2.41684079 -3.99942327 0.66737086  
6 -1.01983237 -4.46271944 0.68787390  
6 -0.29230264 -4.38322449 1.90688396  
6 1.07886100 -3.94702768 1.93054938  
6 -2.97919250 -3.49547553 1.87776375  
6 -3.82346129 -2.33450699 1.87967408  
6 -3.81453705 0.48377204 1.89422882  
6 -2.96336842 1.63961911 1.90439272  
6 -0.27119115 2.51071024 1.94269323  
6 1.09730911 2.06596899 1.96182883  
6 2.75303507 -0.22655243 1.97187197  
6 2.74863935 -1.66493046 1.96439874  
6 -0.91772515 -3.94880152 3.13742304  
6 -2.24111867 -3.51286125 3.12193179  
6 -3.60472512 -1.62825739 3.12295508  
6 -3.60037684 -0.23658596 3.13014865  
6 -2.22531796 1.63959408 3.14866352  
6 -0.89931244 2.06727648 3.16863585  
6 1.31457627 1.34387410 3.19605446  
6 2.13128090 0.21432374 3.20214605  
6 2.12417483 -2.11475801 3.19004726  
6 1.30054200 -3.23913336 3.17220879  
6 1.74958837 -0.95308983 3.97098207  
6 0.08171537 1.35193491 3.95746851  
6 -2.62413120 0.48187679 3.92168260  
6 -2.63286090 -2.36081052 3.90694284  
6 0.06761783 -3.24768806 3.93364525  
6 -0.30286038 -2.12477446 4.68360710  
6 0.55550522 -0.95325494 4.70091534  
6 -0.29566634 0.22359417 4.69577169  
6 -1.67787910 -0.22049250 4.67822361  
6 -1.68233490 -1.67210233 4.67069292  
6 1.12832808 2.07869983 -0.45174602  
6 -3.69353652 -0.16074279 -1.76137805  
6 -2.18477058 1.72579944 -1.76622796  
6 -3.69806933 -1.65248501 -1.76914263  
6 -2.20088649 -3.54812050 -1.79362285  
6 0.15412845 -3.23558402 -2.51805997  
6 1.35802054 -3.21811485 -1.71119618  
2 -2.56251884 -0.90588421 -2.57497025

# He@C<sub>70</sub>, TS<sub>ccdeed</sub>

6 -1.57990766 -1.65169275 -3.28196692  
6 -1.58044291 -0.19651422 -3.30148196  
6 -0.20432916 0.24597479 -3.28261185  
6 0.64271343 -0.93703222 -3.25151801  
6 -0.20646617 -2.10965300 -3.26574087  
6 -2.54508615 -2.33827424 -2.54131413  
6 1.80842268 -0.93847454 -2.48168612  
6 0.17226174 1.39616513 -2.55283952  
6 -2.57470894 0.51288640 -2.59050846  
6 -0.85721076 -3.94906020 -1.75423872  
6 2.16839647 -2.10448194 -1.70451546  
6 2.16513181 0.22655037 -1.69304943  
6 1.37454772 1.36547518 -1.71760857  
6 -0.81794554 2.16160297 -1.88095045  
6 -0.26219422 -4.39920902 -0.51114166  
6 1.10454488 -3.95975065 -0.49242163  
6 2.75776696 -1.66240656 -0.45876428  
6 2.75573254 -0.22636791 -0.44995874  
6 -0.13812454 2.67700839 -0.50449479  
6 -3.11964869 1.71820784 -0.54526913  
6 -3.84766340 0.50812268 -0.55041724  
6 -3.77998900 -2.32781363 -0.53947431  
6 -2.94461131 -3.49589777 -0.53686160  
6 1.74566603 -3.60034037 0.72593307  
6 2.60701251 -2.41053081 0.74305648  
6 2.60568523 0.50573814 0.75979257  
6 1.76994061 1.71379495 0.75649333  
6 -0.95611268 2.78916550 0.79466957  
6 -2.55285001 2.27571535 0.77282798  
6 -4.13970995 -0.18636703 0.67556733  
6 -4.11475372 -1.65509963 0.66774631  
6 -2.41613340 -4.02572250 0.67425364  
6 -1.02267313 -4.49046326 0.68801200  
6 -0.29342142 -4.41063166 1.90636206  
6 1.07654214 -3.97013474 1.92512679  
6 -2.97782540 -3.52063513 1.87650311  
6 -3.81677341 -2.34947300 1.87223351  
6 -3.84263372 0.48207438 1.89547360  
6 -3.03140163 1.68751097 1.94172323  
6 -0.25366288 2.58068466 1.97974801  
6 1.10884881 2.07414246 1.96328270  
6 2.73837113 -0.24179719 1.96201754  
6 2.73926783 -1.68243229 1.95481837  
6 -0.91783231 -3.97388411 3.13649869  
6 -2.24187255 -3.53664804 3.12178850  
6 -3.59989977 -1.64468694 3.11211610  
6 -3.59681916 -0.25121841 3.11619186  
6 -2.23537445 1.64622855 3.16558981  
6 -0.90666753 2.07347441 3.18377614  
6 1.30615401 1.32521772 3.18331552  
6 2.12074757 0.19466057 3.19046545  
6 2.11985803 -2.13423324 3.18154192  
6 1.29873705 -3.26119018 3.16686058  
6 1.74283123 -0.97332346 3.95996237  
6 0.07377305 1.33220637 3.94594073  
6 -2.61877537 0.46652326 3.90911746  
6 -2.63141680 -2.37976027 3.90003395  
6 0.06822525 -3.27056432 3.93031526  
6 -0.30341467 -2.14668632 4.68068266  
6 0.55184007 -0.97440320 4.69378519  
6 -0.29921541 0.20296243 4.68571424  
6 -1.67614985 -0.23973846 4.66693974  
6 -1.68156147 -1.69248569 4.66315937  
6 1.15848303 2.11782122 -0.48187411  
6 -3.55415034 -0.21928401 -1.78511298  
6 -2.23304152 1.70653427 -1.90041423  
6 -3.53330088 -1.60569179 -1.77110076  
6 -2.17733598 -3.50177169 -1.76403141  
6 0.14722721 -3.24156189 -2.51745319  
6 1.35645115 -3.23729992 -1.72391796  
2 -1.62881386 2.19642377 -0.50435930



# He@C<sub>70</sub>, TS<sub>dedde</sub>

6 -1.60010052 -1.65097177 -3.27717566  
6 -1.59623969 -0.19964053 -3.26922894  
6 -0.21278736 0.24650718 -3.25647879  
6 0.63614970 -0.93347424 -3.24628377  
6 -0.22160946 -2.10409951 -3.26292396  
6 -2.57037973 -2.34952402 -2.54835701  
6 1.81113923 -0.94027281 -2.48779058  
6 0.15274265 1.38099670 -2.53617573  
6 -2.56001616 0.49663916 -2.53278327  
6 -0.87448937 -3.95050716 -1.75900829  
6 2.16061544 -2.10516691 -1.70830441  
6 2.19441342 0.22631849 -1.71842790  
6 1.40105009 1.38502145 -1.76924348  
6 -0.86372042 2.12947536 -1.79249966  
6 -0.27928132 -4.39773464 -0.51798195  
6 1.08980346 -3.95316696 -0.49807811  
6 2.75116825 -1.65815723 -0.46751484  
6 2.78241014 -0.21721126 -0.47211680  
6 -0.28536317 2.64644432 -0.60522145  
6 -2.95002031 1.66710162 -0.53101563  
6 -3.77990079 0.48870441 -0.53462744  
6 -3.80349517 -2.34429932 -0.54836816  
6 -2.96539640 -3.51458097 -0.54537112  
6 1.73065138 -3.59166050 0.71846336  
6 2.59128404 -2.39911985 0.73520434  
6 2.67414045 0.52866077 0.75187981  
6 1.91229057 1.75810039 0.74929732  
6 -1.10051417 2.74842548 0.71835148  
6 -2.44307351 2.21071553 0.69931871  
6 -4.11311865 -0.19525003 0.66634089  
6 -4.12785912 -1.66580486 0.65828842  
6 -2.43441868 -4.03632975 0.66596889  
6 -1.03848934 -4.49505711 0.68030775  
6 -0.30834353 -4.41066980 1.89749002  
6 1.06076658 -3.96609092 1.91529298  
6 -2.99445367 -3.52751398 1.86970103  
6 -3.83253264 -2.35722327 1.86506474  
6 -3.80897999 0.47576201 1.88223374  
6 -2.97940469 1.65402341 1.91120839  
6 -0.31743023 2.63217211 2.05998516  
6 1.18820906 2.13725281 2.07545519  
6 2.75302672 -0.23028953 1.97006977  
6 2.72209001 -1.67109954 1.94928753  
6 -0.93329507 -3.97668052 3.12855482  
6 -2.25695705 -3.54161882 3.11488938  
6 -3.61397290 -1.64896977 3.10555816  
6 -3.60545421 -0.25517729 3.11205912  
6 -2.24984217 1.64137709 3.16155171  
6 -0.92411852 2.10259342 3.22740102  
6 1.34065199 1.35813916 3.25066948  
6 2.13515759 0.19994457 3.20655155  
6 2.10191321 -2.13129425 3.17065191  
6 1.28191662 -3.25821304 3.15540624  
6 1.73363435 -0.97476912 3.95393372  
6 0.07425450 1.34606290 3.98725915  
6 -2.63752341 0.46214214 3.90913129  
6 -2.64789176 -2.38402319 3.89397168  
6 0.05379107 -3.27210021 3.92161846  
6 -0.31702515 -2.14656758 4.66742897  
6 0.54073524 -0.97594172 4.68396711  
6 -0.30835345 0.20397227 4.68636942  
6 -1.69165468 -0.24210812 4.66105270  
6 -1.69551849 -1.69344079 4.65336227  
6 1.22027612 2.15152526 -0.58976138  
6 -3.54675126 -0.22904971 -1.76695704  
6 -2.19058514 1.66775107 -1.76350808  
6 -3.55524445 -1.62283075 -1.77558875  
6 -2.19815302 -3.51544619 -1.77253497  
6 0.13130081 -3.23760200 -2.52050304  
6 1.34063458 -3.23207879 -1.72486031  
2 0.42372856 2.30754757 0.73432982

## He<sub>2</sub>@C<sub>60</sub>

|   |             |             |             |
|---|-------------|-------------|-------------|
| 6 | -0.23522345 | 2.41307825  | 2.59952986  |
| 6 | -0.11977965 | 1.23087686  | 3.34185782  |
| 6 | 1.13478164  | 0.49438559  | 3.34235478  |
| 6 | 2.22376665  | 0.96953705  | 2.60050539  |
| 6 | 2.10316089  | 2.19859358  | 1.83366217  |
| 6 | 0.89718377  | 2.90653378  | 1.83317267  |
| 6 | 3.04330877  | 0.04507304  | 1.83443231  |
| 6 | 2.74265516  | -1.32063862 | 1.83472805  |
| 6 | 1.61073122  | -1.81519460 | 2.60110722  |
| 6 | 0.82201816  | -0.92636403 | 3.34266705  |
| 6 | 2.81605255  | -2.07925072 | 0.59638791  |
| 6 | 1.72957290  | -3.04336621 | 0.59639213  |
| 6 | 0.98507257  | -2.88026861 | 1.83473359  |
| 6 | -0.40670763 | -3.01634592 | 1.83443895  |
| 6 | -1.10500793 | -3.32052247 | 0.59580436  |
| 6 | -0.38821845 | -3.47857510 | -0.59494734 |
| 6 | 1.05745162  | -3.33720092 | -0.59464647 |
| 6 | -2.35767991 | -2.58515244 | 0.59532339  |
| 6 | -2.84434956 | -2.03668335 | -0.59589636 |
| 6 | -2.10029766 | -2.20180101 | -1.83423814 |
| 6 | -0.89433937 | -2.90977491 | -1.83376885 |
| 6 | -3.42553663 | -0.70545247 | -0.59638141 |
| 6 | -3.04046171 | -0.04828538 | -1.83501683 |
| 6 | -2.22091423 | -0.97274916 | -2.60108330 |
| 6 | -1.13193858 | -0.49760155 | -3.34295004 |
| 6 | -0.81917235 | 0.92315425  | -3.34325652 |
| 6 | -1.60788251 | 1.81198040  | -2.60168933 |
| 6 | -2.73980533 | 1.31742588  | -1.83530721 |
| 6 | -2.81321176 | 2.07604391  | -0.59696949 |
| 6 | -1.72671707 | 3.04014281  | -0.59697033 |
| 6 | -0.98221564 | 2.87704503  | -1.83530874 |
| 6 | 0.40956249  | 3.01314476  | -1.83502858 |
| 6 | 1.10786226  | 3.31732260  | -0.59639040 |
| 6 | 0.39106738  | 3.47534658  | 0.59436204  |
| 6 | -1.05460666 | 3.33400353  | 0.59406752  |
| 6 | -1.44146051 | 2.67787828  | 1.83270087  |
| 6 | 2.84720843  | 2.03347556  | 0.59531607  |
| 6 | 2.36052163  | 2.58193069  | -0.59590325 |
| 6 | -2.48744127 | 1.74971612  | 1.83271274  |
| 6 | -3.18491367 | 1.44364661  | 0.59407408  |
| 6 | 0.62870510  | 1.06472776  | -3.34295634 |
| 6 | 1.22999855  | 2.08947018  | -2.60110216 |
| 6 | 2.43597052  | 1.82351735  | -1.83424182 |
| 6 | -3.49720976 | 0.02504598  | 0.59437270  |
| 6 | 0.23807025  | -2.41629400 | -2.60011146 |
| 6 | 0.12262551  | -1.23408715 | -3.34242961 |
| 6 | 1.21075899  | -0.26852693 | -3.34245821 |
| 6 | 1.44430634  | -2.68108240 | -1.83327831 |
| 6 | 2.49029012  | -1.75292375 | -1.83329088 |
| 6 | 2.37085224  | -0.52375951 | -2.60013915 |
| 6 | -1.22715083 | -2.09268419 | 2.60052121  |
| 6 | -2.43312753 | -1.82673798 | 1.83366436  |
| 6 | -2.99263270 | -0.54513042 | 1.83319017  |
| 6 | 3.18776328  | -1.44685860 | -0.59465461 |
| 6 | -0.62585786 | -1.06794199 | 3.34237450  |
| 6 | 2.99549228  | 0.54191750  | -1.83377668 |
| 6 | 3.50006315  | -0.02825983 | -0.59495524 |
| 6 | 3.42838056  | 0.70223962  | 0.59579697  |
| 6 | -1.20791575 | 0.26531668  | 3.34188670  |
| 6 | -2.36800281 | 0.52054697  | 2.59955580  |
| 2 | 0.00165190  | -0.00186652 | -0.96362122 |
| 2 | 0.00118006  | -0.00125368 | 0.96303243  |

## He<sub>2</sub>@C<sub>60</sub>, TS<sub>hex</sub>

|   |             |             |             |
|---|-------------|-------------|-------------|
| 2 | -0.00237356 | 0.03844215  | -0.00212866 |
| 6 | 0.20134509  | -3.27098894 | 1.56679451  |
| 6 | 1.39212942  | -3.24964690 | 0.83422428  |
| 6 | 0.03308637  | -2.38708568 | 2.70897675  |
| 6 | 2.46421909  | -2.34352636 | 1.21336257  |
| 6 | 1.06239223  | -1.50783992 | 3.06876159  |
| 6 | 2.29867911  | -1.48569191 | 2.30821562  |
| 6 | -1.07566428 | -3.35733223 | 0.87636840  |
| 6 | 1.35361457  | -3.31378222 | -0.61812150 |
| 6 | -1.11268866 | -3.41901565 | -0.52001935 |
| 6 | 0.12579034  | -3.39679384 | -1.28195512 |
| 6 | 3.08889437  | -1.85146046 | -0.00061244 |
| 6 | 2.40204287  | -2.44710422 | -1.13177109 |
| 6 | 3.52921104  | -0.52389777 | -0.07092139 |
| 6 | 2.17684603  | -1.68868256 | -2.28765512 |
| 6 | 3.30055547  | 0.25863403  | -1.26947796 |
| 6 | 2.63266706  | -0.31136209 | -2.35434222 |
| 6 | 3.01638412  | 1.63163817  | -0.87626141 |
| 6 | 1.63730812  | 0.45987961  | -3.08723688 |
| 6 | 2.08169937  | 2.39715695  | -1.61274254 |
| 6 | 1.35526657  | 1.77446377  | -2.72996378 |
| 6 | 1.22075629  | 3.29734302  | -0.92963302 |
| 6 | -0.03501934 | 2.25403881  | -2.75716472 |
| 6 | -0.23168835 | 3.19914412  | -1.71491492 |
| 6 | -1.34446526 | -1.93088901 | 2.72674274  |
| 6 | -2.02893090 | -2.52649522 | 1.59411681  |
| 6 | -1.64008844 | -0.61650270 | 3.10916185  |
| 6 | -2.97862530 | -1.78104389 | 0.88392514  |
| 6 | -2.62695146 | 0.15243910  | 2.37704325  |
| 6 | -3.27930379 | -0.41727313 | 1.28262258  |
| 6 | -2.18369985 | 1.53847194  | 2.32275987  |
| 6 | -3.50489616 | 0.36775765  | 0.07617264  |
| 6 | -2.43967414 | 2.31615257  | 1.16874373  |
| 6 | -3.09316564 | 1.69477081  | 0.00664540  |
| 6 | -1.46558857 | 3.24922276  | 0.72296923  |
| 6 | -2.50349641 | 2.20982170  | -1.23860550 |
| 6 | -1.50938404 | 3.17626405  | -0.92890996 |
| 6 | 1.26048148  | 3.36350799  | 0.56865036  |
| 6 | -0.14817348 | 3.33829451  | 1.43524230  |
| 6 | 2.15843534  | 2.52499843  | 1.28193247  |
| 6 | 0.10554138  | 2.48823714  | 2.54484916  |
| 6 | 1.49355996  | 2.00487375  | 2.48652601  |
| 6 | 1.79716766  | 0.72621983  | 2.94280338  |
| 6 | 0.75079107  | -0.14480798 | 3.46154666  |
| 6 | -0.57479513 | 0.29118094  | 3.48656154  |
| 6 | 3.05465388  | 1.69539106  | 0.56736982  |
| 6 | 2.75417233  | -0.10891803 | 2.22909927  |
| 6 | 3.36242986  | 0.36171499  | 1.06444407  |
| 6 | -0.91435266 | 1.62429333  | 3.00904512  |
| 6 | -2.30709147 | 1.33289480  | -2.33153272 |
| 6 | -1.07601357 | 1.35494995  | -3.08886695 |
| 6 | -2.74935126 | -0.05149411 | -2.23997211 |
| 6 | -0.75906670 | -0.01583471 | -3.46436214 |
| 6 | -1.80078542 | -0.88425052 | -2.95265412 |
| 6 | -1.48227799 | -2.16052103 | -2.47209620 |
| 6 | -2.10450411 | -2.65241385 | -1.25678432 |
| 6 | -3.01705980 | -1.84507632 | -0.56581664 |
| 6 | -3.34158874 | -0.52103955 | -1.06665587 |
| 6 | -0.10464121 | -2.61660171 | -2.48708653 |
| 6 | 0.90213072  | -1.77486968 | -2.97684860 |
| 6 | 0.56700498  | -0.45101944 | -3.47116756 |
| 2 | -0.14385040 | 3.23106337  | -0.13939643 |

## He<sub>2</sub>@C<sub>70</sub>

|   |             |             |             |
|---|-------------|-------------|-------------|
| 6 | -1.21431935 | 0.22729544  | 3.96970582  |
| 6 | -2.37843370 | 0.44521350  | 3.22219563  |
| 6 | -2.95598507 | -0.63176131 | 2.44396663  |
| 6 | -3.47157526 | -0.08237574 | 1.20882726  |
| 6 | -3.20671868 | 1.33249259  | 1.20882988  |
| 6 | -2.52731824 | 1.65817666  | 2.44396996  |
| 6 | -3.46646929 | -0.83233130 | 0.00001140  |
| 6 | -3.47157812 | -0.08237127 | -1.20880103 |
| 6 | -3.20672083 | 1.33249629  | -1.20879900 |
| 6 | -2.93068433 | 2.02982330  | 0.00001636  |
| 6 | -2.95599031 | -0.63175303 | -2.44394302 |
| 6 | -2.52732325 | 1.65818346  | -2.44393969 |
| 6 | -2.37844014 | 0.44522336  | -3.22216964 |
| 6 | -1.21432912 | 0.22730786  | -3.96968579 |
| 6 | -0.15908556 | 1.22508216  | 3.96970940  |
| 6 | -0.31156626 | 2.39956093  | 3.22219896  |
| 6 | -1.51430571 | 2.61604047  | 2.44397140  |
| 6 | -1.15113604 | 3.27617264  | 1.20883346  |
| 6 | 0.27632692  | 3.46148658  | 1.20882988  |
| 6 | 0.79602116  | 2.91598439  | 2.44397116  |
| 6 | -1.86281240 | 3.03956604  | 0.00001672  |
| 6 | -1.15113890 | 3.27617455  | -1.20880115 |
| 6 | 0.27632362  | 3.46148944  | -1.20880151 |
| 6 | 1.02481985  | 3.41444564  | 0.00001280  |
| 6 | -1.51431108 | 2.61604643  | -2.44394016 |
| 6 | 0.79601443  | 2.91599059  | -2.44394612 |
| 6 | -0.31157458 | 2.39956951  | -3.22217226 |
| 6 | -0.15909578 | 1.22509420  | -3.96968889 |
| 6 | 1.11595190  | 0.52982831  | 3.96970892  |
| 6 | 2.18582749  | 1.03777969  | 3.22219586  |
| 6 | 2.02004313  | 2.24854946  | 2.44397020  |
| 6 | 2.76008129  | 2.10714459  | 1.20882547  |
| 6 | 3.37744164  | 0.80681264  | 1.20882165  |
| 6 | 3.01923537  | 0.14398463  | 2.44396448  |
| 6 | 2.31512952  | 2.71086502  | 0.00000904  |
| 6 | 2.76007819  | 2.10714817  | -1.20881069 |
| 6 | 3.37743831  | 0.80681580  | -1.20881379 |
| 6 | 3.56399679  | 0.08041728  | 0.00000238  |
| 6 | 2.02003598  | 2.24855614  | -2.44395208 |
| 6 | 3.01922965  | 0.14399114  | -2.44395828 |
| 6 | 2.18581891  | 1.03778899  | -3.22218370 |
| 6 | 1.11594188  | 0.52984035  | -3.96969652 |
| 6 | 0.84873289  | -0.89764941 | 3.96970391  |
| 6 | 1.66242898  | -1.75819564 | 3.22218776  |
| 6 | 2.76270723  | -1.22637689 | 2.44396019  |
| 6 | 2.85690331  | -1.97388935 | 1.20881581  |
| 6 | 1.81099951  | -2.96286607 | 1.20881760  |
| 6 | 1.06991589  | -2.82701254 | 2.44395804  |
| 6 | 3.29357743  | -1.36415756 | -0.00000052 |
| 6 | 2.85690308  | -1.97388864 | -1.20881808 |
| 6 | 1.81099379  | -2.96286416 | -1.20881772 |
| 6 | 1.17779994  | -3.36476374 | 0.00000070  |
| 6 | 2.76270390  | -1.22637165 | -2.44396019 |
| 6 | 1.06991220  | -2.82700706 | -2.44395900 |
| 6 | 1.66242349  | -1.75818789 | -3.22218752 |
| 6 | 0.84872383  | -0.89763826 | -3.96969819 |
| 6 | -0.59145355 | -1.08462405 | 3.96970224  |
| 6 | -1.15843701 | -2.12441993 | 3.22218871  |
| 6 | -0.31264609 | -3.00650668 | 2.44395876  |
| 6 | -0.99446821 | -3.32709026 | 1.20881855  |
| 6 | -2.25824356 | -2.63798022 | 1.20882177  |
| 6 | -2.35804081 | -1.89119017 | 2.44396353  |
| 6 | -0.27963859 | -3.55397391 | 0.00000254  |
| 6 | -0.99446887 | -3.32708335 | -1.20881164 |
| 6 | -2.25824404 | -2.63797951 | -1.20881069 |
| 6 | -2.83614230 | -2.15996718 | 0.00000690  |
| 6 | -0.31265104 | -3.00649786 | -2.44395447 |
| 6 | -2.35804582 | -1.89118087 | -2.44394708 |
| 6 | -1.15844512 | -2.12440944 | -3.22217870 |
| 6 | -0.59146327 | -1.08461189 | -3.96969104 |
| 2 | 0.00111578  | 0.00064919  | 1.10041356  |
| 2 | 0.00170307  | -0.00011055 | -1.10094702 |

# He<sub>2</sub>@C<sub>70</sub>, TS<sub>abcba</sub>

|   |             |             |             |
|---|-------------|-------------|-------------|
| 6 | -1.54692519 | -1.73380017 | -3.43174458 |
| 6 | -1.54185176 | -0.07538988 | -3.42311859 |
| 6 | -0.17736596 | 0.29635081  | -3.29926634 |
| 6 | 0.66027999  | -0.91221225 | -3.25675583 |
| 6 | -0.18474190 | -2.11512709 | -3.31180310 |
| 6 | -2.59384966 | -2.47806787 | -2.63708329 |
| 6 | 1.80901527  | -0.91980463 | -2.47177243 |
| 6 | 0.16856670  | 1.40654957  | -2.49331355 |
| 6 | -2.58421302 | 0.66693377  | -2.62072873 |
| 6 | -0.84954953 | -3.94412541 | -1.75758886 |
| 6 | 2.17230129  | -2.09065557 | -1.69359386 |
| 6 | 2.17943096  | 0.24064502  | -1.68146932 |
| 6 | 1.37253380  | 1.37347066  | -1.68681192 |
| 6 | -0.83102810 | 2.11311245  | -1.72609639 |
| 6 | -0.25884083 | -4.37141848 | -0.50662512 |
| 6 | 1.11031175  | -3.93528843 | -0.48237920 |
| 6 | 2.77019501  | -1.65276968 | -0.45250595 |
| 6 | 2.77459693  | -0.21377487 | -0.44502273 |
| 6 | -0.23777752 | 2.52374578  | -0.47076777 |
| 6 | -2.94724083 | 1.67810571  | -0.51500034 |
| 6 | -3.83677602 | 0.52749354  | -0.52737558 |
| 6 | -3.84568524 | -2.35280991 | -0.54231888 |
| 6 | -2.96312451 | -3.50884509 | -0.54196125 |
| 6 | 1.75369132  | -3.58089614 | 0.73468131  |
| 6 | 2.61859751  | -2.39598775 | 0.75141114  |
| 6 | 2.62750721  | 0.51779342  | 0.76656359  |
| 6 | 1.76985788  | 1.70807457  | 0.76218504  |
| 6 | -0.99787229 | 2.60701656  | 0.72546953  |
| 6 | -2.39768124 | 2.15214896  | 0.70017946  |
| 6 | -4.13833952 | -0.18388744 | 0.68164331  |
| 6 | -4.14285707 | -1.65200675 | 0.67405230  |
| 6 | -2.41643262 | -3.99879503 | 0.66818511  |
| 6 | -1.01945364 | -4.46248913 | 0.68871045  |
| 6 | -0.29211378 | -4.38356018 | 1.90799069  |
| 6 | 1.07933295  | -3.94750214 | 1.93163896  |
| 6 | -2.97911358 | -3.49557877 | 1.87880766  |
| 6 | -3.82358027 | -2.33446455 | 1.88075733  |
| 6 | -3.81528878 | 0.48414457  | 1.89551246  |
| 6 | -2.96354032 | 1.63991880  | 1.90555310  |
| 6 | -0.27105558 | 2.51097274  | 1.94382501  |
| 6 | 1.09770620  | 2.06632137  | 1.96290421  |
| 6 | 2.75347877  | -0.22653344 | 1.97292960  |
| 6 | 2.74907875  | -1.66503024 | 1.96544909  |
| 6 | -0.91759378 | -3.94922614 | 3.13860369  |
| 6 | -2.24097919 | -3.51300168 | 3.12296557  |
| 6 | -3.60506105 | -1.62823141 | 3.12417316  |
| 6 | -3.60090542 | -0.23643158 | 3.13144279  |
| 6 | -2.22528529 | 1.63986349  | 3.14978456  |
| 6 | -0.89920473 | 2.06764388  | 3.16984129  |
| 6 | 1.31498802  | 1.34406483  | 3.19717097  |
| 6 | 2.13173175  | 0.21442968  | 3.20329237  |
| 6 | 2.12461257  | -2.11495399 | 3.19118190  |
| 6 | 1.30098259  | -3.23945403 | 3.17334008  |
| 6 | 1.74991095  | -0.95313567 | 3.97208285  |
| 6 | 0.08190694  | 1.35210574  | 3.95862579  |
| 6 | -2.62427640 | 0.48200706  | 3.92286873  |
| 6 | -2.63292193 | -2.36083245 | 3.90806961  |
| 6 | 0.06785695  | -3.24786758 | 3.93470550  |
| 6 | -0.30271003 | -2.12485886 | 4.68457365  |
| 6 | 0.55567753  | -0.95327693 | 4.70188427  |
| 6 | -0.29554054 | 0.22365338  | 4.69678211  |
| 6 | -1.67785454 | -0.22043347 | 4.67923784  |
| 6 | -1.68227780 | -1.67213154 | 4.67169809  |
| 6 | 1.12868643  | 2.07902837  | -0.45109889 |
| 6 | -3.69418144 | -0.16076435 | -1.76106954 |
| 6 | -2.18474364 | 1.72589648  | -1.76575577 |
| 6 | -3.69877434 | -1.65262914 | -1.76881289 |
| 6 | -2.20088196 | -3.54827189 | -1.79317808 |
| 6 | 0.15436706  | -3.23573852 | -2.51744628 |
| 6 | 1.35849476  | -3.21840978 | -1.71069074 |
| 2 | -2.56312823 | -0.90593410 | -2.57493901 |
| 2 | -0.64801615 | -0.92849785 | 0.64585030  |

## He<sub>2</sub>@C<sub>70</sub>, TS<sub>ccdeed</sub>

|   |             |             |             |
|---|-------------|-------------|-------------|
| 2 | -0.01695283 | -0.05012813 | 0.00024041  |
| 6 | 1.38011158  | 3.72471452  | -1.18744147 |
| 6 | 0.03838848  | 4.08396006  | -0.75439900 |
| 6 | 0.02897610  | 4.09497309  | 0.69180387  |
| 6 | 1.36507952  | 3.74283290  | 1.14723468  |
| 6 | 2.20282507  | 3.52613068  | -0.01317960 |
| 6 | 1.55601478  | 2.89785743  | -2.29897666 |
| 6 | 1.52647555  | 2.93338418  | 2.27364683  |
| 6 | -1.09857762 | 3.63432479  | 1.40781260  |
| 6 | -1.07972682 | 3.61224914  | -1.47802126 |
| 6 | 3.35636258  | 1.66947949  | -1.15472710 |
| 6 | 2.52754045  | 1.88867188  | 2.28516102  |
| 6 | 0.36573845  | 2.42094040  | 2.97849870  |
| 6 | -0.91523600 | 2.75201130  | 2.56242847  |
| 6 | -2.25834346 | 3.21279311  | 0.70411527  |
| 6 | 3.65356183  | 0.32616389  | -0.69703311 |
| 6 | 3.64424157  | 0.33729953  | 0.73904419  |
| 6 | 1.99504113  | 0.75072652  | 3.00365925  |
| 6 | 0.66300541  | 1.07680702  | 3.43099523  |
| 6 | -2.86372375 | 1.96052504  | 1.53305328  |
| 6 | -2.84318733 | 1.93636858  | -1.59995747 |
| 6 | -1.93587744 | 1.69861805  | -2.65600204 |
| 6 | 0.70752639  | 1.02352369  | -3.43860292 |
| 6 | 2.03387403  | 0.70427030  | -2.98898411 |
| 6 | 3.20852566  | -0.79638666 | 1.48031950  |
| 6 | 2.35594392  | -0.58220983 | 2.65787077  |
| 6 | -0.34695193 | 0.08026528  | 3.52612948  |
| 6 | -1.71053767 | 0.40937930  | 3.09019303  |
| 6 | -3.51779771 | 0.76857316  | 0.81113118  |
| 6 | -3.50677562 | 0.75559860  | -0.86833763 |
| 6 | -1.67027855 | 0.36136279  | -3.11798239 |
| 6 | -0.30126721 | 0.02558125  | -3.53122544 |
| 6 | 2.39009953  | -0.62311780 | -2.61788535 |
| 6 | 3.22733021  | -0.81892228 | -1.42620432 |
| 6 | 3.07896614  | -2.02310944 | -0.68414432 |
| 6 | 3.06965518  | -2.01194978 | 0.75516778  |
| 6 | 1.47214162  | -1.64341938 | -2.98175192 |
| 6 | 0.14206839  | -1.32190013 | -3.43223953 |
| 6 | -2.49190712 | -0.68345892 | -2.61196804 |
| 6 | -3.38059330 | -0.49111369 | -1.47786057 |
| 6 | -3.39953899 | -0.46853954 | 1.44146073  |
| 6 | -2.52565289 | -0.64323866 | 2.58985043  |
| 6 | 0.09749936  | -1.26853383 | 3.45383620  |
| 6 | 1.43325388  | -1.59683704 | 3.02561069  |
| 6 | 2.19759822  | -3.08207178 | -1.12649071 |
| 6 | 1.40713942  | -2.89554477 | -2.25946712 |
| 6 | -0.74212027 | -2.37415767 | -2.99271250 |
| 6 | -2.03078437 | -2.05282497 | -2.57263231 |
| 6 | -3.39774704 | -1.73052812 | -0.70615071 |
| 6 | -3.40678906 | -1.71974373 | 0.68887174  |
| 6 | -2.06414247 | -2.01297450 | 2.57765961  |
| 6 | -0.78103387 | -2.32758570 | 3.01929688  |
| 6 | 1.37749159  | -2.86002612 | 2.32206917  |
| 6 | 2.18253112  | -3.06401229 | 1.20244372  |
| 6 | 0.00640273  | -3.32571316 | 2.32344174  |
| 6 | -2.61435771 | -2.68554831 | 1.41770506  |
| 6 | -2.59604549 | -2.70741701 | -1.40962696 |
| 6 | 0.03613364  | -3.36132145 | -2.27135372 |
| 6 | 1.64705181  | -3.74113727 | 0.03964419  |
| 6 | 0.31920657  | -4.18853474 | 0.03452275  |
| 6 | -0.51767898 | -3.97528958 | 1.20070839  |
| 6 | -1.85588396 | -3.64758754 | 0.73963886  |
| 6 | -1.84652317 | -3.65878487 | -0.70698243 |
| 6 | -0.50249755 | -3.99346542 | -1.14555967 |
| 6 | -1.97010267 | 1.73927557  | 2.60427141  |
| 6 | -0.88148135 | 2.71197152  | -2.61632109 |
| 6 | -2.24821377 | 3.20140076  | -0.78242785 |
| 6 | 0.40462217  | 2.37452364  | -3.01101303 |
| 6 | 2.55713558  | 1.85327828  | -2.28138304 |
| 6 | 3.17926359  | 2.52211809  | 0.00093682  |
| 6 | 3.34123898  | 1.68752801  | 1.17191696  |
| 2 | -2.85773563 | 1.92765379  | -0.03334710 |

# He<sub>2</sub>@C<sub>70</sub>, TS<sub>dedde</sub>

6 -1.60034561 -1.65147150 -3.27747273  
6 -1.59646904 -0.20005272 -3.26946187  
6 -0.21292895 0.24610490 -3.25663733  
6 0.63606638 -0.93393683 -3.24653220  
6 -0.22176494 -2.10463858 -3.26331258  
6 -2.57071424 -2.35011911 -2.54876018  
6 1.81126320 -0.94073492 -2.48822045  
6 0.15259591 1.38056147 -2.53617263  
6 -2.56033707 0.49630934 -2.53311896  
6 -0.87464678 -3.95127583 -1.75932407  
6 2.16080713 -2.10580516 -1.70871723  
6 2.19435263 0.22596598 -1.71869254  
6 1.40098155 1.38477361 -1.76924133  
6 -0.86380458 2.12926555 -1.79250503  
6 -0.27937964 -4.39822388 -0.51806432  
6 1.08967435 -3.95358586 -0.49837521  
6 2.75122094 -1.65876591 -0.46773776  
6 2.78220439 -0.21769544 -0.47227725  
6 -0.28531080 2.64707732 -0.60548645  
6 -2.95013738 1.66667080 -0.53115678  
6 -3.78022742 0.48828420 -0.53482616  
6 -3.80400109 -2.34497237 -0.54865426  
6 -2.96565986 -3.51527572 -0.54568172  
6 1.73033488 -3.59207439 0.71845716  
6 2.59097457 -2.39946699 0.73519868  
6 2.67320967 0.52794927 0.75186479  
6 1.91242278 1.75821328 0.74929947  
6 -1.10053849 2.74865246 0.71835232  
6 -2.44274068 2.20969176 0.69931710  
6 -4.11297655 -0.19570325 0.66634011  
6 -4.12749386 -1.66640306 0.65828961  
6 -2.43454671 -4.03642893 0.66596693  
6 -1.03846264 -4.49544764 0.68030608  
6 -0.30844381 -4.41115952 1.89756501  
6 1.06063032 -3.96651316 1.91558254  
6 -2.99472451 -3.52821183 1.86999786  
6 -3.83304548 -2.35789967 1.86533153  
6 -3.80931091 0.47533953 1.88241982  
6 -2.97952485 1.65359092 1.91134167  
6 -0.31738427 2.63280201 2.06025791  
6 1.18854523 2.13776374 2.07572484  
6 2.75281692 -0.23077533 1.97021997  
6 2.72213745 -1.67171049 1.94950509  
6 -0.93346000 -3.97745252 3.12885857  
6 -2.25719261 -3.54233718 3.11527348  
6 -3.61446977 -1.64943099 3.10585046  
6 -3.60601234 -0.25555378 3.11242723  
6 -2.24999022 1.64107251 3.16177201  
6 -0.92420262 2.10238314 3.22740173  
6 1.34058344 1.35789144 3.25066304  
6 2.13509035 0.19958928 3.20681047  
6 2.10209489 -2.13193703 3.17106223  
6 1.28205240 -3.25901246 3.15613985  
6 1.73374784 -0.97523576 3.95436144  
6 0.07410797 1.34562767 3.98724794  
6 -2.63785219 0.46180853 3.90945506  
6 -2.64823604 -2.38462281 3.89436054  
6 0.05364968 -3.27278018 3.92210317  
6 -0.31718993 -2.14711094 4.66780806  
6 0.54064596 -0.97640693 4.68420839  
6 -0.30849877 0.20356826 4.68652058  
6 -1.69188952 -0.24252284 4.66127586  
6 -1.69577062 -1.69394374 4.65364790  
6 1.22061872 2.15203929 -0.59001756  
6 -3.54730034 -0.22942199 -1.76734257  
6 -2.19072795 1.66744924 -1.76373529  
6 -3.55573392 -1.62328863 -1.77589762  
6 -2.19837928 -3.51616001 -1.77293229  
6 0.13117124 -3.23827648 -2.52099848  
6 1.34078813 -3.23287010 -1.72559893  
2 0.42405990 2.30856609 0.73433912  
2 -0.63180149 -0.90399277 0.70443302
